# Supplementary material for: Differential expression and correlation analysis of whole transcriptome for type 2 diabetes mellitus
Source: Front Endocrinol (Lausanne). 2025 Aug 29;16:1541261. doi: 10.3389/fendo.2025.1541261 (PMC12425763; doi:10.3389/fendo.2025.1541261)
Supplement: Supplementary file 2 [file Table2.xlsx]

## Sheet: Sheet1
id	logFC	pvalue	sign
GSTA7P	4.46302	0.0138499	Up
PDK4	-1.1005	0.00280357	Down
ZMYND10	-1.11134	0.00133625	Down
TKTL1	-1.09425	0.0188472	Down
LTF	-1.4977	0.0333702	Down
RGPD5	-3.02213	0.017849	Down
RP11-277J24.1	3.93436	0.0197181	Up
MYOM2	-3.94508	1.03e-05	Down
CRIP1P2	3.89068	0.0213461	Up
TNFRSF17	-1.11213	0.0186383	Down
LINC00854	3.86416	0.0280814	Up
ANKRD18B	3.86383	0.0199175	Up
FBXO40	3.79058	0.00370168	Up
IGKV5-2	3.57594	0.0126857	Up
COL17A1	-1.29002	0.0333676	Down
PLEKHG4B	3.47138	0.0168996	Up
IFI35	-1.28942	0.0208795	Down
CHST6	3.38931	0.0118899	Up
FGF22	-3.79088	0.017827	Down
GALNT9	3.28797	0.0311263	Up
HMMR	-1.35102	0.00105604	Down
MARCKSL1P2	3.2424	0.0355847	Up
CEACAM6	-1.15403	0.00766644	Down
RGS1	-1.07675	0.0148332	Down
PKD1P1	3.12173	0.0140717	Up
CRISP3	-1.76949	0.000125768	Down
SNORD92	3.1005	0.0295422	Up
RNA5SP156	3.08828	0.0349041	Up
GGT5	-2.26236	0.00433111	Down
MIOX	-2.18356	0.0349649	Down
GZMH	-1.13732	0.000548973	Down
GZMB	-1.24724	0.000126372	Down
Metazoa_SRP	3.0796	0.00818794	Up
PROCR	-1.07118	0.0261779	Down
BPI	-1.00425	0.0243116	Down
TNFSF13B	-1.01152	0.0405178	Down
OLFM4	-1.3836	0.00882	Down
NKAIN2	2.96096	0.0133945	Up
ITGB8	-1.35469	0.0408982	Down
COBL	-2.68491	0.0287681	Down
KCNT1	-2.45135	0.00330389	Down
PTGDS	-1.30113	2.23e-07	Down
RASD1	-1.51238	0.030792	Down
CHRNE	-1.22351	0.000223182	Down
AREG	-2.87348	0.000128097	Down
ARHGEF17	-1.15844	0.0166175	Down
RN7SL320P	2.9525	0.00725908	Up
HBEGF	-1.2754	0.0152145	Down
RNF103-CHMP3	2.92397	0.034366	Up
IL4	-2.21846	0.0102077	Down
PDGFRB	-1.06594	0.0120294	Down
COL7A1	-1.23258	0.00608641	Down
SLC4A3	-1.1115	0.0163834	Down
POMC	-1.30133	0.0223075	Down
OTOF	-1.56091	0.0370316	Down
IL1R2	-1.24493	0.0108957	Down
IL18R1	-1.11652	0.00887347	Down
IL18RAP	-1.09637	0.0258795	Down
HSD11B1	2.9206	0.0277902	Up
IGKV6-21	2.84581	0.0295312	Up
MMP8	-1.66142	0.00264802	Down
AK2P2	2.82796	0.021666	Up
TRPM6	-1.04098	0.0459526	Down
RPS23P5	2.82536	0.0349233	Up
DUSP1	-1.17453	0.00555064	Down
RPS6KA6	2.80755	0.0362559	Up
EGR1	-1.97844	0.00191425	Down
INHBA	-1.86891	0.00253698	Down
NR4A1	-1.00112	0.0140332	Down
G0S2	-2.10108	0.000492822	Down
PFKFB2	-1.01	0.0320906	Down
RNGTTP1	2.78129	0.0461015	Up
IL17C	-2.68087	0.042429	Down
CEACAM8	-1.2761	0.0214229	Down
EREG	-1.65145	0.0160846	Down
MYRF	-1.82085	0.000687898	Down
KIR2DL1	-1.63719	0.00601108	Down
FOSB	-1.1478	0.0196909	Down
CTD-2014D20.1	2.51328	0.00393236	Up
CCDC144NL	2.51073	0.0275929	Up
APOBEC3A	-1.05363	0.0256237	Down
RIBC2	-2.91916	0.0295339	Down
STOX1	2.4789	0.00659623	Up
SCO2	-1.02977	0.0341658	Down
HELZ2	-1.02048	0.0282134	Down
RP1-153P14.7	2.45398	0.000112094	Up
AKAP12	-1.49386	0.00932339	Down
TMEM158	2.44805	0.00228838	Up
JCHAIN	-1.46825	0.00391667	Down
PALM	2.43673	0.0110776	Up
TCN1	-1.25225	4.36e-05	Down
OASL	-1.09765	0.0122891	Down
HTR1B	-3.25399	0.0447135	Down
IER3	-1.19596	0.0106573	Down
FGFBP2	-1.288	3.29e-05	Down
PAK6	-1.05701	0.0436365	Down
SPTBN5	-1.00658	0.0053861	Down
HECW2	-1.03483	0.0256064	Down
PRDM5	-1.33796	0.0124096	Down
GPR84	-1.74368	0.00985324	Down
SLC27A2	-1.1499	0.0259546	Down
HDC	-1.41643	0.00471803	Down
BCL2A1	-1.06258	0.0253438	Down
FKBP10	-2.76508	0.0212331	Down
RP5-1055C14.6	2.37415	0.00955693	Up
RP11-493L12.6	2.24815	0.00879111	Up
CELF3	2.21312	0.0134002	Up
LOX	2.21109	0.00774533	Up
SIAH3	2.18935	0.0218327	Up
ATP6V1C2	-3.23404	0.0498223	Down
TM4SF19	-1.31852	0.00371759	Down
GTF2H2	-2.45235	0.000764566	Down
TNFRSF21	-1.00336	0.00667545	Down
DAAM2	-1.58268	0.000282345	Down
MYO16	2.17524	7.2e-05	Up
CCNB3	-1.07647	0.0305285	Down
GSDMC	-2.10979	0.0429772	Down
DSP	2.15451	0.00719385	Up
MIR548AT	2.14885	0.0356946	Up
PTGES	-1.47591	0.0456726	Down
LCN2	-1.17709	0.00343387	Down
MS4A3	-1.63969	0.000738427	Down
MS4A2	-1.29609	0.0472048	Down
PRSS23	-1.02059	0.00377131	Down
IFIT5	-1.25026	0.0132828	Down
MTND2P32	2.14755	0.0453882	Up
MIR3648-2	2.13823	0.00628996	Up
TGFB2	2.10937	8.12e-05	Up
ENPP3	-1.1385	0.00452734	Down
TDRD12	2.10891	0.00505123	Up
MTCYBP28	2.10598	0.0279157	Up
AFF2	-1.03652	0.000443524	Down
SH3RF2	-2.19407	0.000743955	Down
HYDIN	-3.83534	0.0107731	Down
DRC1	-1.75131	0.0222092	Down
AGAP1	-1.04446	0.00222661	Down
DUSP2	-1.1449	0.00731382	Down
LRRC43	-1.54592	0.000553449	Down
GPR153	-1.13557	0.0013347	Down
TNFRSF19	2.04793	0.0422708	Up
NBL1	2.02997	0.0188522	Up
M1AP	-1.21095	0.0260713	Down
ENPP7P1	2.02595	0.0189517	Up
SPON2	-1.20081	1.16e-06	Down
S100B	-1.12503	0.0458784	Down
CLDND2	-1.02379	0.00742307	Down
ZNF208	-1.36505	0.00519307	Down
PTGER1	-4.08555	0.00893997	Down
IGHV3-36	2.02441	0.00343836	Up
PLB1	-1.17718	0.0118418	Down
TVP23CP2	2.01552	0.0429675	Up
RPL39L	-1.20888	0.00485479	Down
SLC51A	-2.12085	0.0421884	Down
CAMP	-1.60851	6.19e-05	Down
MAOB	2	0.0201473	Up
KIF26A	1.98921	0.0272396	Up
SLC30A8	-3.49622	0.0472679	Down
DEFA4	-1.51426	0.00501385	Down
CPA6	-3.003	0.0351094	Down
WNK2	-1.51903	0.0432883	Down
SLC44A3	1.98276	0.0184514	Up
TPBG	1.96289	0.015826	Up
CLEC4D	-1.57233	0.0344669	Down
NKX3-1	-2.33429	0.00106679	Down
LAIR2	-1.33031	0.0372786	Down
KIR3DL1	-1.46741	0.00029945	Down
FAM57A	-1.29166	0.0262201	Down
MGP	1.94574	0.0050777	Up
MT1L	1.93228	0.000493664	Up
FAM178B	-1.46226	0.00856098	Down
RNASE3	-1.96739	0.000593071	Down
NMUR1	-1.02162	9.47e-05	Down
RP11-482L11.1	1.85244	0.0272127	Up
TCEAL9	1.85113	0.0165735	Up
OLR1	-1.42235	0.0191789	Down
XCR1	-1.618	0.0186192	Down
MIR146B	1.83164	0.0434175	Up
PODN	-1.49408	1.98e-05	Down
CMKLR1	-1.20002	5.64e-05	Down
MACROD2	1.83104	0.0020932	Up
ELOVL3	1.8268	0.0183795	Up
IQSEC3	1.81353	0.0309565	Up
ZNF683	-1.40093	0.0190546	Down
BOK	-2.07395	7.7e-05	Down
C8G	-1.15803	0.045865	Down
FBXO39	-1.39825	0.0399975	Down
RNU7-133P	1.80018	0.0472945	Up
LRRN4CL	-3.23057	0.0457575	Down
SAMD9L	-1.09918	0.0309285	Down
DPY19L2	-1.25922	0.0272273	Down
LRRC75B	-1.14912	0.0336689	Down
GOLGA8Q	-1.57009	0.00228419	Down
GLDC	-2.20603	0.00340265	Down
ERICH3	-1.66247	0.0246104	Down
KLHDC7A	-2.64479	0.0198826	Down
CCDC89	-1.12495	0.0293648	Down
HLA-DQB1	-3.48133	0.00287184	Down
GATA2	-1.54956	7.45e-05	Down
EGR3	-1.51605	0.00829154	Down
APOBEC3B	-1.09406	0.0353324	Down
ABCA13	-1.3819	0.00226288	Down
C10orf10	1.75611	0.0161187	Up
OR2AE1	1.75373	0.00194062	Up
OR6K4P	-2.55945	0.0269302	Down
IGHV3-35	1.7468	0.0251815	Up
PRF1	-1.00753	0.000441504	Down
Y_RNA	1.728	0.0182763	Up
HIST3H2BA	-2.40404	0.0173233	Down
HHIPL1	-3.27117	0.00554784	Down
LZTS1	1.7149	0.0372789	Up
MCEMP1	-1.26103	0.0240922	Down
SLC25A10	-1.76075	0.0342308	Down
GDF7	1.68326	0.0100907	Up
IGKV2-24	1.6471	0.0394835	Up
TACSTD2	-1.55663	0.0269135	Down
EFNA5	-1.07642	0.00828761	Down
CSF1	-1.02145	0.0398357	Down
LCN12	-1.28526	0.014041	Down
LHFP	1.63385	0.034587	Up
RGPD2	-2.16302	0.012443	Down
IRF7	-1.19271	0.0225034	Down
VPREB3	1.6317	0.000212264	Up
LILRP1	-2.06469	0.0114181	Down
CARMIL3	-1.10722	0.00317463	Down
RTN4RL2	-2.2811	0.0417452	Down
MIR1205	1.5772	0.0352585	Up
COL4A1	-2.79707	0.0029635	Down
TRBV14	1.55548	0.0398041	Up
AGRN	-1.05533	0.00915893	Down
DDX55P1	1.55337	0.0409736	Up
TEKT4P2	-1.6741	0.000603837	Down
FAM26F	-1.45406	0.000870259	Down
RN7SL65P	1.54468	0.0247838	Up
AKR1C3	-1.65589	6.58e-08	Down
KIF19	-2.04661	9.45e-05	Down
NTNG2	-1.00191	0.0172633	Down
FAM72A	-1.36805	0.0207662	Down
COL13A1	-2.11953	1.6e-07	Down
DNAH10	-1.05035	0.0362619	Down
CLEC9A	-1.32208	0.000353191	Down
TUBBP5	1.52755	0.0313894	Up
NTRK1	-1.3888	0.00815906	Down
ZNF658B	-1.20469	0.0175434	Down
PPIAP22	-1.11746	0.041484	Down
RORB	-2.53761	0.000216322	Down
RNU5E-1	-2.53874	0.0236812	Down
RNA5SP68	-2.40487	0.0264429	Down
SNORD14E	-1.48517	0.0298388	Down
SNORA68	-1.93762	0.0159567	Down
RN7SKP71	-1.18699	0.0498974	Down
RNU6-646P	-1.62483	0.0263013	Down
AC092566.1	1.49714	0.0413428	Up
RP4-603I14.3	1.48559	0.00968496	Up
EFCAB2	-1.40055	0.00282847	Down
FOXO6	-3.42753	0.0188143	Down
NOTCH4	-1.0866	0.000112444	Down
RANBP17	-1.06958	0.00231127	Down
MTND1P32	1.48048	0.0252059	Up
ADGRG1	-1.12374	0.00275313	Down
CPT1B	-2.01822	0.0259867	Down
CYP2D7	-1.02575	0.00864183	Down
KLRC2	-1.19999	0.0296172	Down
RPS3AP47	-2.43691	0.0460912	Down
ENAH	1.47136	0.0258144	Up
IGHV3-49	1.46131	0.0325685	Up
TNR	1.43177	0.0269085	Up
MIR320E	-1.1624	0.0174715	Down
AQP10	1.41709	0.00262599	Up
PPIAP2	1.41411	0.0292971	Up
IGKV3D-20	-3.25056	0.0211759	Down
TRGJ2	-1.31015	0.0114685	Down
TRGV10	-1.31361	0.00551335	Down
TRGV8	-1.04675	0.00559018	Down
FRG1EP	1.41168	0.0409601	Up
IGHV2-5	1.4074	0.0170834	Up
DBNDD1	1.40246	0.0477756	Up
CA6	1.38507	0.0206546	Up
AMZ1	1.377	0.00303278	Up
U3	-3.42931	0.0425649	Down
AURKAPS1	-1.19338	0.0189174	Down
IRF9	-1.02636	0.00472481	Down
SNORA79	1.3614	0.0436352	Up
LCNL1	-1.84772	0.00174001	Down
RP11-1023L17.2	-3.87132	0.00254052	Down
AC011999.1	1.35848	0.0372714	Up
CTA-150C2.20	1.35205	0.0366349	Up
SYCE3	-3.53512	0.0388434	Down
MCOLN3	1.34246	0.0185928	Up
PDCD6IPP2	1.34035	0.0351317	Up
ZCWPW2	1.33416	0.0470958	Up
MIR4645	1.33234	0.0146769	Up
KIR2DS4	-1.81568	0.000968779	Down
CTD-2373H9.3	1.32021	0.0466283	Up
SHISA7	1.31691	0.0140762	Up
UBE2Q2P2	1.31099	0.00142443	Up
RP11-211G3.2	-1.16268	0.0253691	Down
RFPL4A	-4.45375	0.0479853	Down
PRRT4	-1.01001	0.0397547	Down
RNY4P7	1.30023	0.00837798	Up
FTH1P22	-1.12	0.00702244	Down
CASKIN2	1.28911	0.0358806	Up
TRAV19	1.27565	0.0110629	Up
PPP1R8P1	1.27515	0.0236542	Up
RP4-706A16.3	-1.19797	0.0156643	Down
KLLN	-1.01816	0.00534878	Down
FCRL5	1.27493	0.000270682	Up
RP11-206L10.2	-1.00507	0.0225144	Down
ORM1	-1.49548	0.0378007	Down
RNU2-37P	1.26734	0.0135121	Up
RP13-766D20.1	-2.32303	0.0135238	Down
RP5-1052I5.2	1.26289	0.0347268	Up
CEACAM22P	-4.27323	0.00431621	Down
RP11-92K2.2	-3.49335	0.0229788	Down
DNAH12	1.24307	0.022614	Up
RP1-161N10.1	-3.92611	0.00187668	Down
TRGV2	-1.63294	0.0141366	Down
CYP2T1P	-1.32923	0.019111	Down
EBAG9P1	-1.4979	0.0124562	Down
MAP2	1.23203	0.0400853	Up
KIAA0895	1.23067	0.0444081	Up
RN7SL144P	1.2098	0.0136714	Up
RP11-480I12.9	-2.91372	0.0429379	Down
AC010492.2	-1.11814	0.0383451	Down
PNMA6A	-3.02866	0.0496795	Down
ZNF462	1.20757	0.0364981	Up
NRADDP	-1.49819	0.010841	Down
GCNT1P1	-1.09709	0.0412025	Down
RAB6B	1.20642	0.000579921	Up
CCR8	1.20086	0.0228911	Up
MTCL1	1.19658	0.0294596	Up
SCARNA7	-1.1571	0.0144021	Down
HNRNPA1P52	1.18636	0.0287861	Up
KCNH2	1.1723	0.0194057	Up
TAS2R60	1.17137	0.0115892	Up
OR5B21	1.16935	0.0295857	Up
RN7SL124P	-1.68211	0.0458283	Down
METTL15P1	1.16703	0.0273849	Up
KIR2DP1	-1.55045	0.0221685	Down
RNF182	1.16381	0.0175279	Up
SOAT2	1.16215	0.0227056	Up
KIR2DL3	-1.28117	0.00061204	Down
FOXP3	1.15547	0.00351807	Up
RPL23AP42	1.15352	0.019693	Up
EMID1	1.15178	0.0175742	Up
RN7SL280P	-1.90734	0.00505397	Down
TARM1	-1.6219	0.0370102	Down
TMEM110-MUSTN1	-1.05409	0.0175313	Down
NFIB	1.14808	0.0420042	Up
RCC2P6	1.1352	0.0348292	Up
NEFL	1.13443	0.0317489	Up
RP4-669L17.8	-1.28969	0.00870717	Down
MTND4P32	1.1343	0.023571	Up
RP11-98J23.1	-1.74002	0.0160935	Down
OXTR	1.12515	0.00756547	Up
AC008984.5	-3.3956	0.0475539	Down
RP11-511P7.4	1.11555	0.0264233	Up
RP11-497H16.8	-4.81826	0.000106118	Down
PCDHGA10	-1.11953	0.00363853	Down
PCDHGA11	-1.49093	0.00409517	Down
MIR1255A	1.10681	0.0113588	Up
CHKB-CPT1B	-1.32529	0.0252554	Down
TLK2P1	1.09838	0.0431613	Up
SIGLEC12	-2.5504	0.0106135	Down
TRBV6-6	1.09815	0.0480693	Up
RP11-599J14.2	-2.3662	0.0107235	Down
HP	-1.16628	0.0342428	Down
SYNPO	1.09722	0.00605703	Up
TCL1A	1.09677	0.0313554	Up
AKAP2	1.08895	0.0149975	Up
KCNG1	1.078	0.0308566	Up
CTBP2P8	1.07745	0.00457692	Up
RP11-266L9.1	-1.69141	0.0332694	Down
RP11-452D12.1	-1.41468	4.23e-07	Down
METTL21AP1	1.06791	0.0113839	Up
ELOVL4	1.0586	0.0306094	Up
CYP2E1	1.05678	0.0252969	Up
IL4I1	1.05319	0.0194259	Up
KRT18P15	1.05091	0.0131858	Up
RN7SL204P	-3.34695	0.0283897	Down
PMEPA1	1.04983	0.00134282	Up
MIR5587	-1.00467	0.0259756	Down
RP11-927P21.6	-2.86704	0.0226392	Down
MIR3176	-1.07254	0.020612	Down
Y_RNA	1.04938	0.0190006	Up
EBF1	1.04885	0.00430311	Up
PAX5	1.03771	0.0141603	Up
RP11-34P13.16	-1.15923	0.0346069	Down
MTND5P5	1.02937	0.0269035	Up
CABYR	1.02163	0.0117896	Up
Metazoa_SRP	-2.58622	0.0425283	Down
TBC1D3L	-1.28772	0.0448128	Down
CTC-338M12.13	-1.67993	0.0259364	Down
SUSD4	1.01419	0.0114806	Up
SLC25A27	1.01357	0.0443202	Up
MAFIP	-1.75656	0.0147705	Down
FCRL1	1.01266	0.00654892	Up
RP11-823P9.4	-1.39135	0.0345228	Down
ARHGAP22	1.01083	0.00477727	Up
RP11-85I17.2	-3.04266	0.038094	Down
AC003973.3	-1.33778	0.0366529	Down
GS1-204I12.3	-2.02197	0.0255476	Down
RP3-453I5.2	1.00787	0.0164834	Up
FCRL2	1.00512	0.00295686	Up
RP11-69J7.1	-2.07496	0.0287042	Down
RP1-197B17.7	-3.09964	0.0308016	Down
RP5-906A24.1	-1.39778	0.0229602	Down
CTD-2047H16.3	-1.00516	0.0345023	Down
RP13-554M15.5	-1.22373	0.0254672	Down
XXyac-YR38GF2.1	-1.43605	0.0345386	Down
CH17-224D4.1	-4.54031	0.00287575	Down
MIR1262	1.00393	0.0296156	Up
